# Supplementary material for: Accurate identification of 8-oxoguanine in RNA with single-nucleotide resolution using ligase-dependent qPCR
Source: Royal Society of Chemistry journal article supplement (doi:10.1039/d4ob00786g), 2024-01-01
Supplement: d4ob00786g1.pdf [file d4ob00786g1.pdf]

## Electronic Supplementary Information

### Accurate identification of 8-oxoguanine in RNA at single-nucleotide resolution using ligase-dependent qPCR

Xidong Ye,<sup>‡a</sup> Zengguang Li,<sup>‡a</sup> Shangde Ye,<sup>a</sup> Xinqi Liang,<sup>a</sup> Chenyu Bao,<sup>a</sup>  
Mingyang He,<sup>a</sup> Hailan Wang,<sup>a</sup> Laixin Xia<sup>\*a</sup> and Xin Cao<sup>\*a</sup>

Department of Developmental Biology, School of Basic Medical Sciences, Southern Medical University, Guangzhou 510515, China.

Correspondence should be addressed to Xin Cao and Laixin Xia. E-mail: cx123@smu.edu.cn, xialx@smu.edu.cn

<sup>‡</sup> These authors contributed equally.

\* Corresponding authors

### Supplementary tables and figures

**Table S1. The sequences of the nucleic acids used in this assay.**

| Name                   | Sequence (5'-3' direction)                                                  |
|------------------------|-----------------------------------------------------------------------------|
| RNA-1-G                | CUUGGUUUUGUUUGAAUGCAUGUAUAUAGUCAU                                           |
| RNA-1-o <sup>8</sup> G | CUUGGUUUUGUUUGAAUo <sup>8</sup> GCAUGUAUAUAGUCAU                            |
| Probe L                | /PO <sub>4</sub> /ATTCAAACAAAACCAAGCTCTATGGGCAGTCGGTGATA<br>TCGACCTGTACCTCT |
| Probe R                | CCATCTCATCCCTGCGTGTCCATCATCCGTACGTGTATGACT<br>ATATACATrGrC                  |
| DNA Probe R            | CCATCTCATCCCTGCGTGTCCATCATCCGTACGTGTATGACT<br>ATATACATGC                    |
| Probe L2               | /PO <sub>4</sub> /AAAACCAAGCTCTATGGGCAGTCGGTGATATCGACCTG<br>TACCTCT         |
| Probe R2               | CCATCTCATCCCTGCGTGTCCATCATCCGTACGTGTATGACT<br>ATATACATGCATTCAArArC          |
| miR-124 probe<br>L1    | /PO <sub>4</sub> /TACTCTATGGGCAGTCGGTGATATCGACCTGTACCTCT                    |
| miR-124 probe<br>R1    | CCATCTCATCCCTGCGTGTCCATCATCCGTACGTGTGGCATT<br>ACCGCGTGrCrC                  |
| miR-124 probe<br>L2    | /PO <sub>4</sub> /CGCGTGCCCTACTCTATGGGCAGTCGGTGATATCGACCT<br>GTACCTCT       |
| miR-124 probe<br>R2    | CCATCTCATCCCTGCGTGTCCATCATCCGTACGTGTGGCATT<br>rArC                          |
| Let7a probe L1         | /PO <sub>4</sub> /TACTCTATGGGCAGTCGGTGATATCGACCTGTACCTCT                    |
| Let7a probe R1         | CCATCTCATCCCTGCGTGTCCATCATCCGTACGTGTA<br>ACTATACAACCTACTArCrC               |
| Let7a probe L2         | /PO <sub>4</sub> /CTACTACCTCACTCTATGGGCAGTCGGTGATATCGACCT<br>GTACCTCT       |
| Let7a probe R2         | CCATCTCATCCCTGCGTGTCCATCATCCGTACGTGTA<br>ACTAT                              |

|                    |                                                                       |
|--------------------|-----------------------------------------------------------------------|
|                    | ACArArC                                                               |
| miR-29a probe L1   | /PO <sub>4</sub> /TACTCTATGGGCAGTCGGTGATATCGACCTGTACCTCT              |
| miR-29a probe R1   | CCATCTCATCCCTGCGTGTCCATCATCCGTACGTGTTAACCG<br>ATTCAGATGGTrGrC         |
| miR-29a probe L2   | /PO <sub>4</sub> /AGATGGTGCTACTCTATGGGCAGTCGGTGATATCGACCT<br>GTACCTCT |
| miR-29a probe R2   | CCATCTCATCCCTGCGTGTCCATCATCCGTACGTGTTAACCG<br>ATTrTrC                 |
| universal primer F | CCATCTCATCCCTGCGTGTC                                                  |
| universal primer R | AGAGGTACAGGTCGATATCA                                                  |

## 1 Optimization of the ligation ligation-based qPCR method.

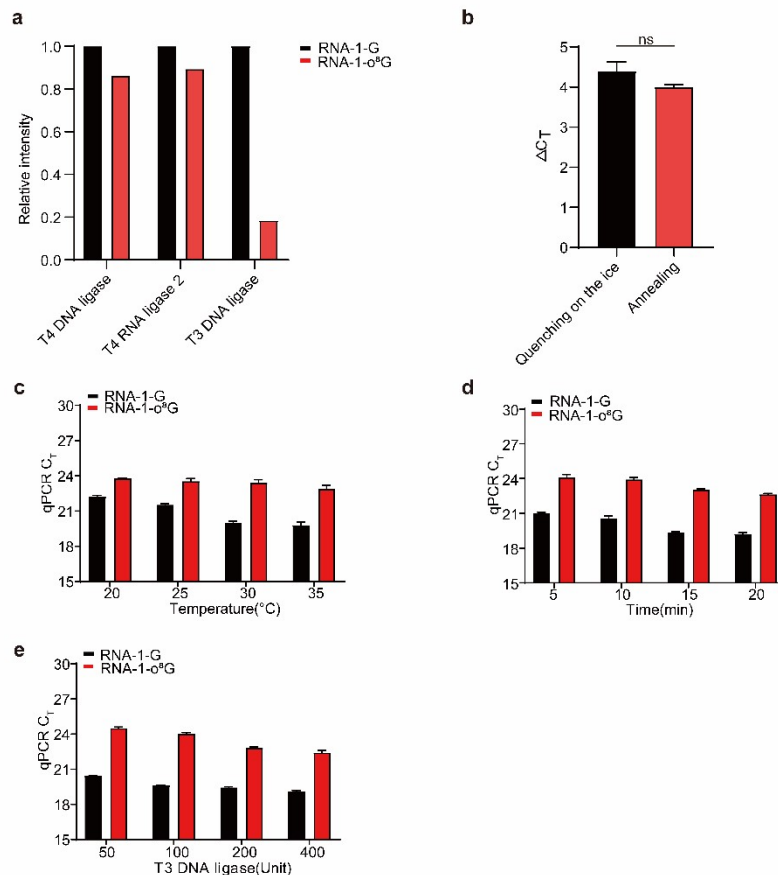

**Figure. S1** Optimization of the ligation ligation-based qPCR method.

(a) The relative ratios of pixel intensities between the RNA-1-G segment and the RNA-1-o<sup>8</sup>G segment, determined using different ligases. (b) Comparison of two conditions prior to the ligation process. (c-e) Optimization of ligation reaction parameters, including temperature (c), ligation time (d), and T3 DNA ligase concentration (e), for the ligation-dependent qPCR assay. The bar graph displays the qPCR threshold cycle (C<sub>T</sub>) values between RNA-1-o<sup>8</sup>G and RNA-1-G under varied reaction conditions.

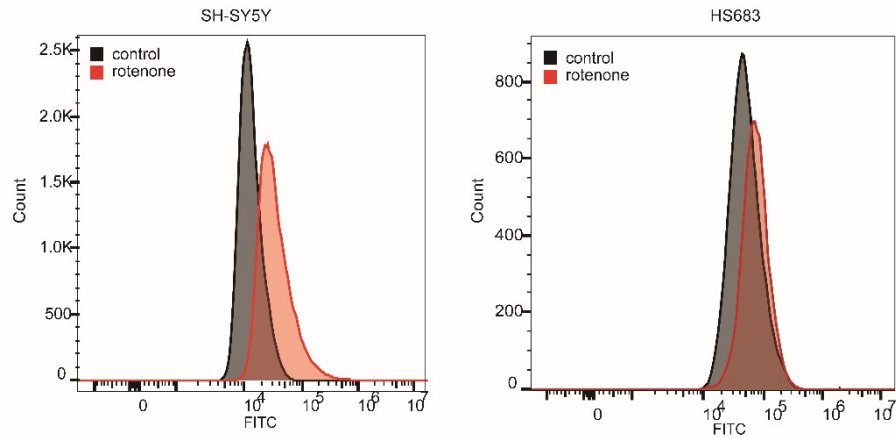

**Figure S2** The ROS levels are increased by rotenone treatment in neuronal cells. **(a-b)** Flow cytometry analysis depicting ROS levels in SH-SY5Y cells **(a)** and HS683 cells **(b)** following treatment with DMSO (vehicle control) and 5  $\mu$ M rotenone.

### 3 Identification of miRNA o<sup>8</sup>G sites in HS683 cells with ROS damage

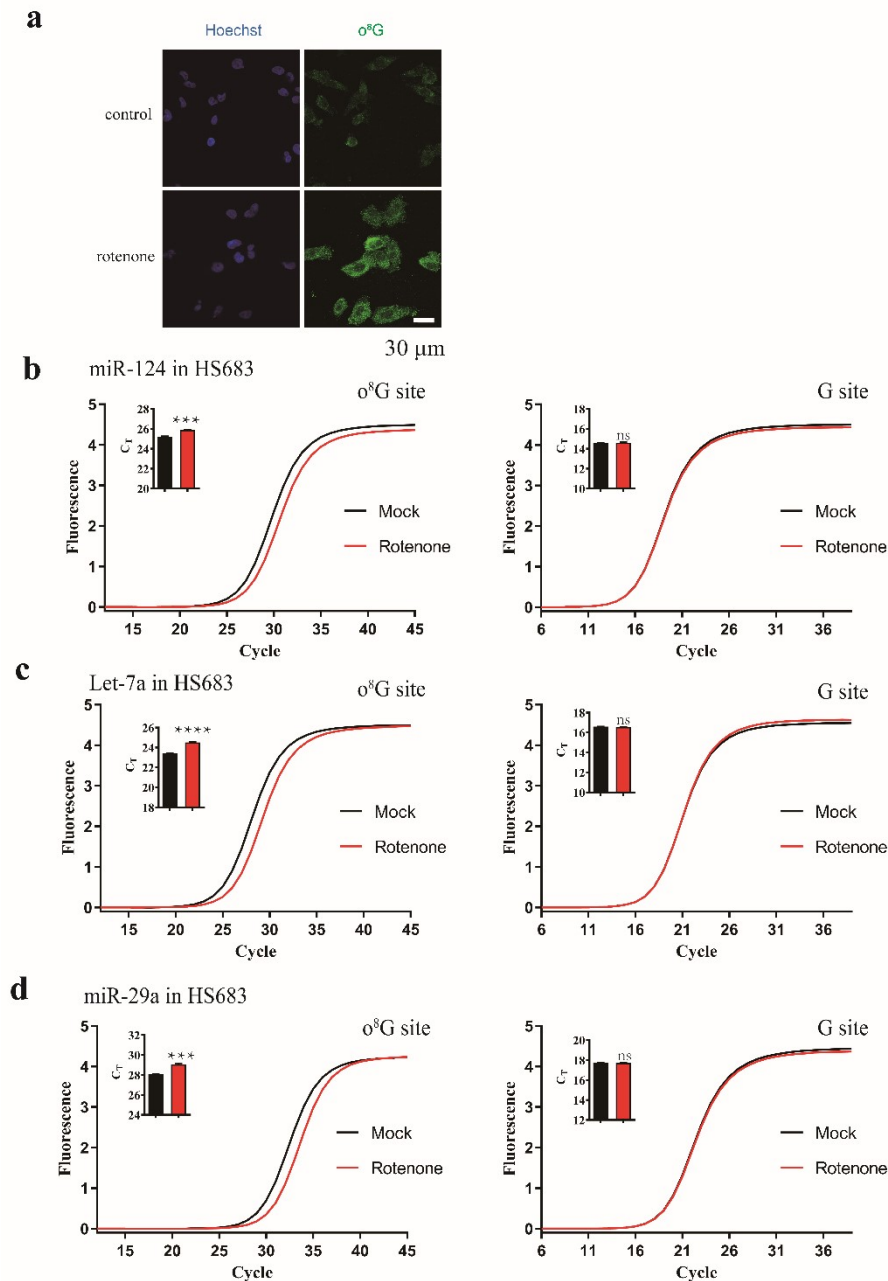

**Figure S3** Identification of miRNA o<sup>8</sup>G sites in HS683 cells with ROS damage.

(a) Fluorescence immunostaining images displaying the presence of o<sup>8</sup>G in control HS683 cells and cells treated with 5 μM rotenone. The scale bar represents 30 μm. (b-d) Real-time qPCR amplification curves and corresponding bar graphs showing the threshold cycle (C<sub>T</sub>) values for the detection of o<sup>8</sup>G and G sites (used as input control) in miR-124 (b), let-7a (c), and miR-29a (d) using the ligation-based qPCR assay.

#### 4 Rotenone treatment decreases viability in SH-SY5Y cells

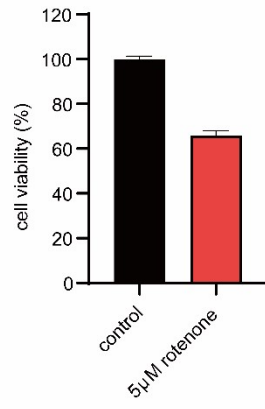

**Figure S4** Rotenone treatment decreases viability in SH-SY5Y cells.
